# Supplementary material
Source: publisher figshare collection journal article supplement (https://frontiersin.figshare.com/ndownloader/files/14557034)
Supplement: Supplementary file [file 14557034]

**A.** Please read the text above the items and then rate how much you like the objects by circling a number between 1 and 9 USE following scale: 1=Do not like at all, 2, 3, 4, 5, 6, 7, 8, 9=like very much. The text describes whether participants are looking TOWARD or AWAY from the objects. There are no correct/incorrect answers.

First please circle your sex MALE FEMALE and write your age \_\_\_\_ (years)

SUB NO: \_\_\_\_\_

|                                                                               |                                                                                 |                                                                                |                                                                               |
|-------------------------------------------------------------------------------|---------------------------------------------------------------------------------|--------------------------------------------------------------------------------|-------------------------------------------------------------------------------|
| Michael looked TOWARD the<br><br><b>Wood Plainer</b><br><br>1 2 3 4 5 6 7 8 9 | Judy looked AWAY from the<br><br><b>Glass Jar</b><br><br>1 2 3 4 5 6 7 8 9      | Megan looked AWAY from the<br><br><b>Rolling Pin</b><br><br>1 2 3 4 5 6 7 8 9  | Justin looked TOWARD the<br><br><b>Slide Ruler</b><br><br>1 2 3 4 5 6 7 8 9   |
| Jennifer looked TOWARD the<br><br><b>Clamp</b><br><br>1 2 3 4 5 6 7 8 9       | Simon looked AWAY from the<br><br><b>Corkscrew</b><br><br>1 2 3 4 5 6 7 8 9     | Robert looked AWAY from the<br><br><b>Colander</b><br><br>1 2 3 4 5 6 7 8 9    | Melissa looked TOWARD the<br><br><b>Shovel</b><br><br>1 2 3 4 5 6 7 8 9       |
| Matthew looked TOWARD the<br><br><b>Hand Drill</b><br><br>1 2 3 4 5 6 7 8 9   | Sarah looked AWAY from the<br><br><b>Baking Pan</b><br><br>1 2 3 4 5 6 7 8 9    | Lucy looked AWAY from the<br><br><b>Crock Pot</b><br><br>1 2 3 4 5 6 7 8 9     | John looked TOWARD the<br><br><b>Stapler</b><br><br>1 2 3 4 5 6 7 8 9         |
| Stephanie looked TOWARD the<br><br><b>Level</b><br><br>1 2 3 4 5 6 7 8 9      | Joshua looked AWAY from the<br><br><b>Grilling Pan</b><br><br>1 2 3 4 5 6 7 8 9 | Joseph looked AWAY from the<br><br><b>Strainer</b><br><br>1 2 3 4 5 6 7 8 9    | Lauren looked TOWARD the<br><br><b>Garden Trowel</b><br><br>1 2 3 4 5 6 7 8 9 |
| David looked TOWARD the<br><br><b>Pliers</b><br><br>1 2 3 4 5 6 7 8 9         | Nicole looked AWAY from the<br><br><b>Hand Mixer</b><br><br>1 2 3 4 5 6 7 8 9   | Rachel looked AWAY from the<br><br><b>Spatula</b><br><br>1 2 3 4 5 6 7 8 9     | Ryan looked TOWARD the<br><br><b>Cement Trowel</b><br><br>1 2 3 4 5 6 7 8 9   |
| Heather looked TOWARD the<br><br><b>Rake</b><br><br>1 2 3 4 5 6 7 8 9         | Andrew looked AWAY from the<br><br><b>Cake Mixer</b><br><br>1 2 3 4 5 6 7 8 9   | Brian looked AWAY from the<br><br><b>Teapot</b><br><br>1 2 3 4 5 6 7 8 9       | Tiffany looked TOWARD the<br><br><b>Vice</b><br><br>1 2 3 4 5 6 7 8 9         |
| Daniel looked TOWARD the<br><br><b>Hacksaw</b><br><br>1 2 3 4 5 6 7 8 9       | Elizabeth looked AWAY from the<br><br><b>Mug</b><br><br>1 2 3 4 5 6 7 8 9       | Emily looked AWAY from the<br><br><b>Toaster</b><br><br>1 2 3 4 5 6 7 8 9      | William looked TOWARD the<br><br><b>Wrench</b><br><br>1 2 3 4 5 6 7 8 9       |
| Samantha looked TOWARD the<br><br><b>Screwdriver</b><br><br>1 2 3 4 5 6 7 8 9 | James looked AWAY from the<br><br><b>Frying Pan</b><br><br>1 2 3 4 5 6 7 8 9    | David looked AWAY from the<br><br><b>Cookie Sheet</b><br><br>1 2 3 4 5 6 7 8 9 | Kimberly looked TOWARD the<br><br><b>Ice Scraper</b><br><br>1 2 3 4 5 6 7 8 9 |

**B.** Please read the text above the items and then rate how much you like the objects by circling a number between 1 and 9 USE following scale: 1=Do not like at all, 2, 3, 4, 5, 6, 7, 8, 9=like very much. The text describes whether participants are looking TOWARD or AWAY from the objects. There are no correct/incorrect answers.

First please circle your sex **MALE FEMALE** and write your age \_\_\_\_ (years)

**SUB NO:** \_\_\_\_\_

|                                                                                  |                                                                              |                                                                             |                                                                                  |
|----------------------------------------------------------------------------------|------------------------------------------------------------------------------|-----------------------------------------------------------------------------|----------------------------------------------------------------------------------|
| Michael looked AWAY from the<br><br><b>Wood Plainer</b><br><br>1 2 3 4 5 6 7 8 9 | Judy looked TOWARD the<br><br><b>Glass Jar</b><br><br>1 2 3 4 5 6 7 8 9      | Megan looked TOWARD the<br><br><b>Rolling Pin</b><br><br>1 2 3 4 5 6 7 8 9  | Justin looked AWAY from the<br><br><b>Slide Ruler</b><br><br>1 2 3 4 5 6 7 8 9   |
| Jennifer looked AWAY from the<br><br><b>Clamp</b><br><br>1 2 3 4 5 6 7 8 9       | Simon looked TOWARD the<br><br><b>Corkscrew</b><br><br>1 2 3 4 5 6 7 8 9     | Robert looked TOWARD the<br><br><b>Colander</b><br><br>1 2 3 4 5 6 7 8 9    | Melissa looked AWAY from the<br><br><b>Shovel</b><br><br>1 2 3 4 5 6 7 8 9       |
| Matthew looked AWAY from the<br><br><b>Hand Drill</b><br><br>1 2 3 4 5 6 7 8 9   | Sarah looked TOWARD the<br><br><b>Baking Pan</b><br><br>1 2 3 4 5 6 7 8 9    | Lucy looked TOWARD the<br><br><b>Crock Pot</b><br><br>1 2 3 4 5 6 7 8 9     | John looked AWAY from the<br><br><b>Stapler</b><br><br>1 2 3 4 5 6 7 8 9         |
| Stephanie looked AWAY from the<br><br><b>Level</b><br><br>1 2 3 4 5 6 7 8 9      | Joshua looked TOWARD the<br><br><b>Grilling Pan</b><br><br>1 2 3 4 5 6 7 8 9 | Joseph looked TOWARD the<br><br><b>Strainer</b><br><br>1 2 3 4 5 6 7 8 9    | Lauren looked AWAY from the<br><br><b>Garden Trowel</b><br><br>1 2 3 4 5 6 7 8 9 |
| David looked AWAY from the<br><br><b>Pliers</b><br><br>1 2 3 4 5 6 7 8 9         | Nicole looked TOWARD the<br><br><b>Hand Mixer</b><br><br>1 2 3 4 5 6 7 8 9   | Rachel looked TOWARD the<br><br><b>Spatula</b><br><br>1 2 3 4 5 6 7 8 9     | Ryan looked AWAY from the<br><br><b>Cement Trowel</b><br><br>1 2 3 4 5 6 7 8 9   |
| Heather looked AWAY from the<br><br><b>Rake</b><br><br>1 2 3 4 5 6 7 8 9         | Andrew looked TOWARD the<br><br><b>Cake Mixer</b><br><br>1 2 3 4 5 6 7 8 9   | Brian looked TOWARD the<br><br><b>Teapot</b><br><br>1 2 3 4 5 6 7 8 9       | Tiffany looked AWAY from the<br><br><b>Vice</b><br><br>1 2 3 4 5 6 7 8 9         |
| Daniel looked AWAY from the<br><br><b>Hacksaw</b><br><br>1 2 3 4 5 6 7 8 9       | Elizabeth looked TOWARD the<br><br><b>Mug</b><br><br>1 2 3 4 5 6 7 8 9       | Emily looked TOWARD the<br><br><b>Toaster</b><br><br>1 2 3 4 5 6 7 8 9      | William looked AWAY from the<br><br><b>Wrench</b><br><br>1 2 3 4 5 6 7 8 9       |
| Samantha looked AWAY from the<br><br><b>Screwdriver</b><br><br>1 2 3 4 5 6 7 8 9 | James looked TOWARD the<br><br><b>Frying Pan</b><br><br>1 2 3 4 5 6 7 8 9    | David looked TOWARD the<br><br><b>Cookie Sheet</b><br><br>1 2 3 4 5 6 7 8 9 | Kimberly looked AWAY from the<br><br><b>Ice Scraper</b><br><br>1 2 3 4 5 6 7 8 9 |
